# Supplementary material
Source: PubMed Central journal article supplement (PMC2859308)
Supplement: NIHMS192768-supplement-1.pdf [file NIHMS192768-supplement-1.pdf]

described in the legend of Figure 3. The scale bar represents 2 amino acid changes per 100 residues.

**Figure 6.** Schematic representation of six fHbp modular groups deduced from phylogenetic analysis. Forty of the 70 proteins contained only  $\alpha$  type segments or  $\beta$  type segments, and were designated as modular groups I and II, respectively. The remaining 30 proteins were chimeras with different combinations of  $\alpha$  (shown in gray) and  $\beta$  segments (shown in white) and could be assigned to one of four modular groups (III-VI). The relationship between the modular group and Massignani variant group designation, and the number of unique sequences observed within each fHbp modular group, are shown.

**Figure 7.** Space-filled structural models of factor H binding protein based on the coordinates of fHbp in a complex with a fragment of human factor H (Schneider *et al.*, 2009). The five variable segments  $V_A$  through  $V_E$  are depicted in different colors ( $V_A$ , blue;  $V_B$ , orange;  $V_C$ , green;  $V_D$ , aqua;  $V_E$ , violet) and the invariant blocks of residues separating each of the variable segments are shown in white. The model in the middle was generated by rotation of  $180^\circ$  around the Y-axis relative to the respective model on the far left. The model on the right was generated by a  $90^\circ$  rotation around the X-axis relative to the model in the middle. The factor H contact residues are depicted in black, and the residues affecting the epitopes of anti-fHbp mAbs are shown in yellow. The figure was constructed with PyMol (<http://www.pymol.org>).

**Supplementary Figure S1.** For each of the five modular variable segments,  $V_A$  to  $V_E$ , the mean number of peptides (Y-axis) and percent amino acid identity (X axis) are shown. The histograms on the left were generated by comparing each of the  $\alpha$  types to the corresponding  $\alpha$  and  $\beta$  types for the other 69 peptides and calculating the respective mean frequency at each

percent identity. The histograms on the right were generated by comparing each of the  $\beta$  types to the corresponding  $\alpha$  and  $\beta$  types. Solid bars represent comparisons with sequences of  $\alpha$  types and open bars represent comparisons with sequences of  $\beta$  types.
